# Supplementary material for: Thinning vertical graphenes, tuning electrical response: from semiconducting to metallic
Source: Royal Society of Chemistry journal article supplement (doi:10.1039/c1jm13835a), 2011-01-01
Supplement: c1jm13835a.pdf [file c1jm13835a.pdf]

† Electronic Supplementary Information

## Thinning Vertical Graphenes, Tuning Electrical Response: from Semiconducting to Metallic

Dong Han Seo,<sup>ab</sup> Shailesh Kumar<sup>a</sup> and Kostya (Ken) Ostrikov<sup>ab\*</sup>

<sup>a</sup> *Plasma Nanoscience Centre Australia (PNCA), CSIRO Materials Science and  
Engineering, P.O. Box 218, Lindfield, New South Wales 2070, Australia*

<sup>b</sup> *Plasma Nanoscience @ Complex Systems, School of Physics, University of Sydney,  
New South Wales 2006, Australia*

\* **Corresponding author:** E-mail: Kostya.Ostrikov@csiro.au.

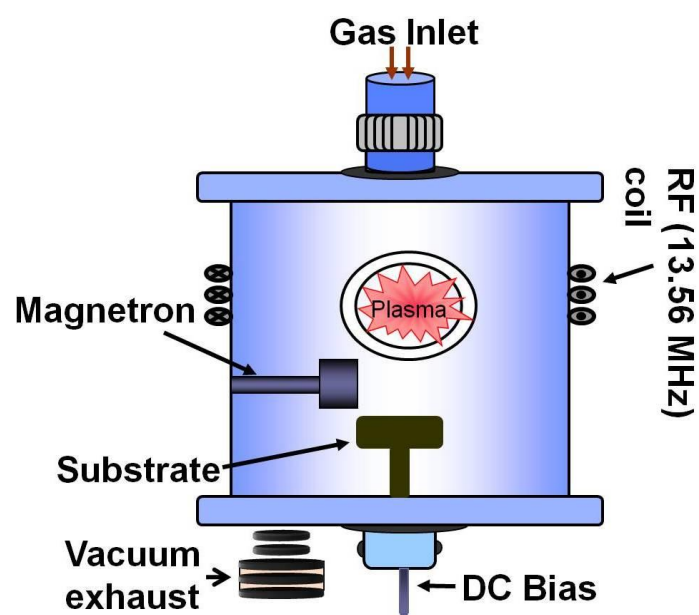

**Fig. S1** Schematic shows the integrated plasma nanofabrication system that includes the inductively coupled plasma enhanced CVD and the integrated magnetron sputtering system.

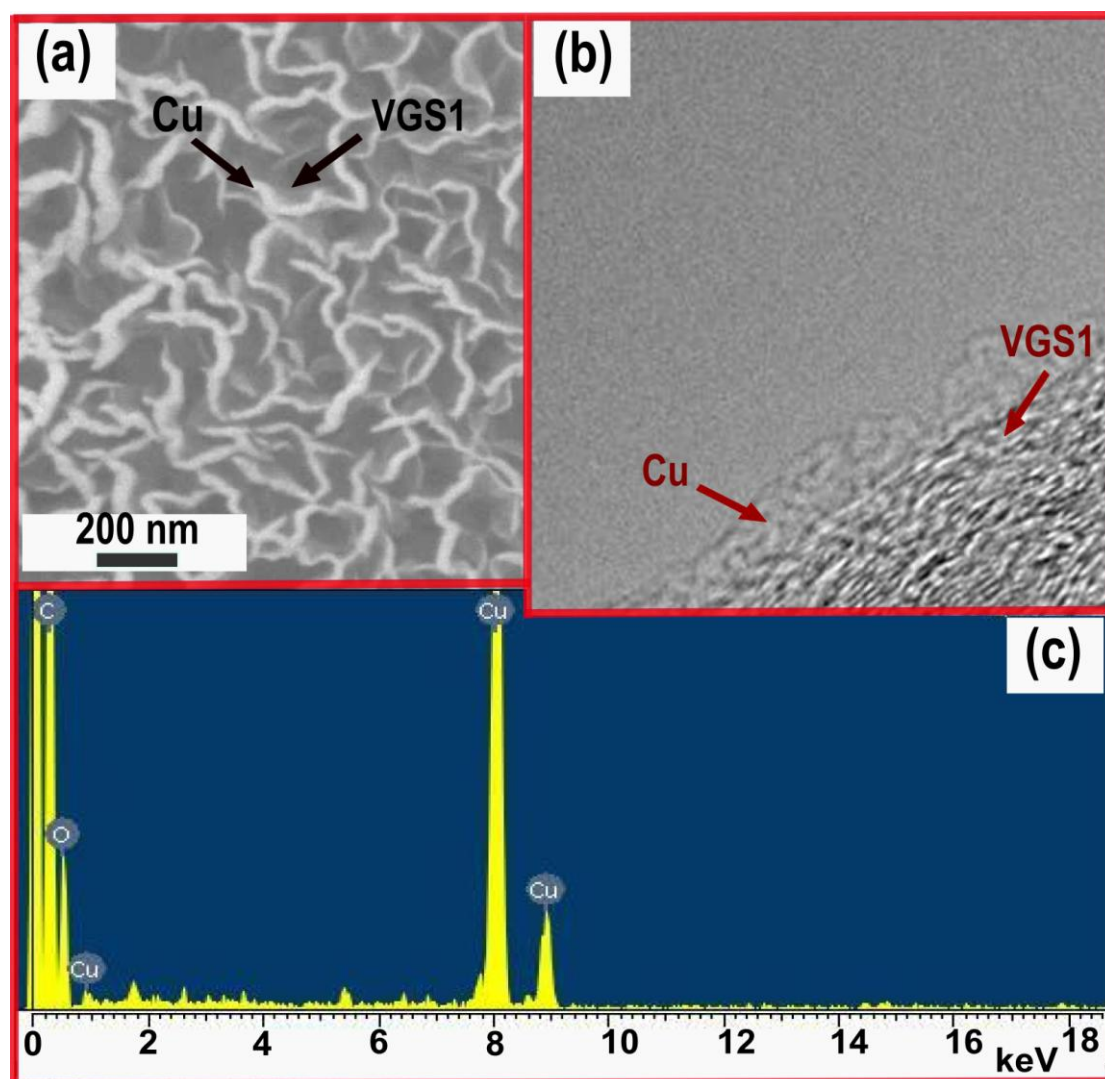

**Fig. S2** (a) SEM image of Cu NP decorated VGS1 networks. (b) High-resolution TEM image shows Cu material deposited on the graphitic edges of the VGS1 structure and the corresponding EDX spectrum in (c) shows the presence of Cu and carbon in VGS1.
